# Supplementary material for: A van der Waals stacked CdS /WSe 2 heterostructure for high-performance photodetection
Source: Royal Society of Chemistry journal article supplement (doi:10.1039/d5nr04342e), 2025-12-29
Supplement: d5nr04342e1.pdf [file d5nr04342e1.pdf]

## Supporting Information

### Van der Waals Stacked CdS /WSe<sub>2</sub> Heterostructure For High-Performance Photodetection

Lei Liu<sup>a,b,d</sup>, Dafei Chen<sup>a,b</sup>, Fan Mu<sup>a,b</sup>, Yan Yang<sup>a,b,d</sup>, Lujun Yang<sup>a,b</sup>, Haiqiang Huang<sup>a,b,d</sup>, Yifei Huang<sup>a,b,d</sup>, Hui Zhang<sup>a,b</sup>, Yingkai Liu<sup>a,b,c,d,\*</sup>

<sup>a</sup> Institute of Physics and Electronic Information, Yunnan Normal University, Kunming 650500, China.

<sup>b</sup> Yunnan Key Laboratory of Opto-electronic Information Technology, Yunnan Normal University, Kunming 650500, China.

<sup>c</sup> Key Laboratory of Advanced Technique & Preparation for Renewable Energy Materials, Ministry of Education, Yunnan Normal University, Kunming 650500, China.

<sup>d</sup> Southwest United Graduate School, Kunming 650092, China.

\* Correspondence: [liuyingkai99@163.com](mailto:liuyingkai99@163.com).

Tel.: +86-871-6594-1166

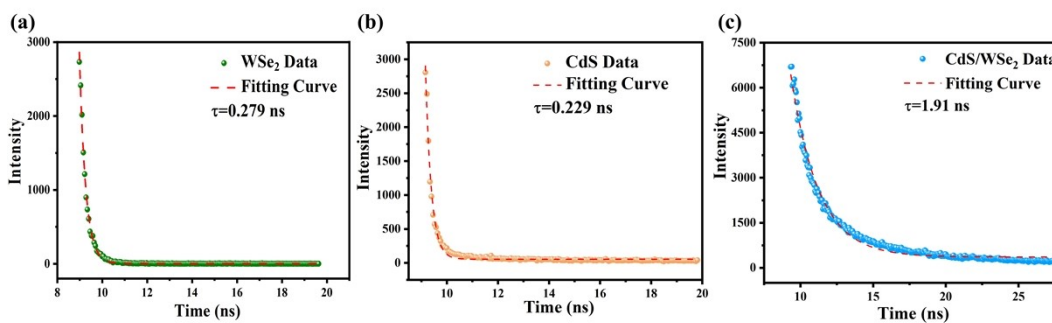

**Figure S1.** Time-resolved PL spectra of (a) isolated WSe<sub>2</sub> and (b) isolated CdS and CdS/WSe<sub>2</sub> HT.

# Supporting Information

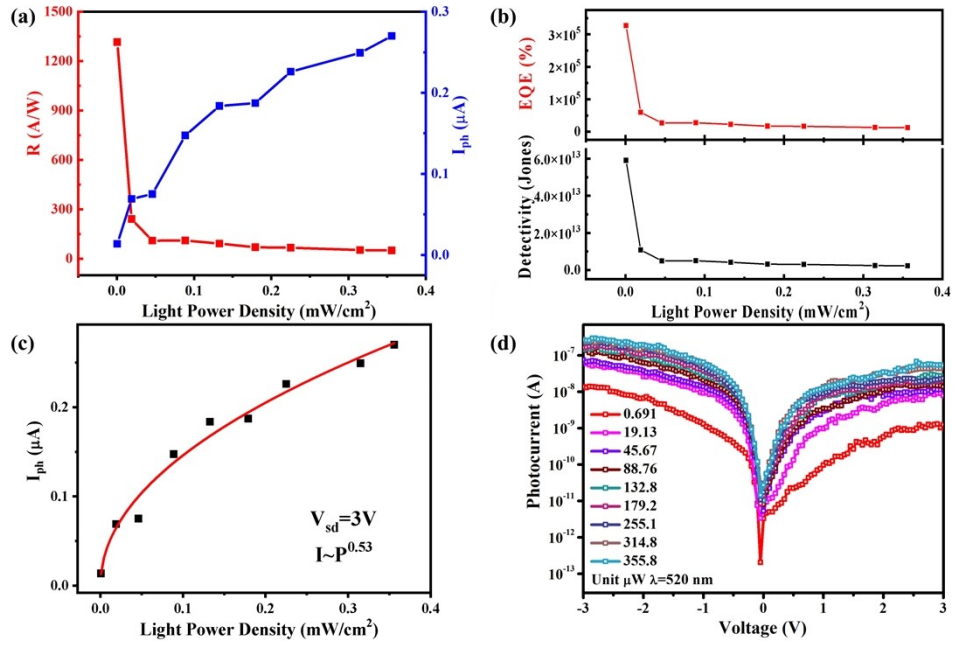

**Figure S2.** The incident light power of CdS/WSe<sub>2</sub> photodetector as a function of (a) photoresponse and photocurrent, (b) EQE and detectivity; (c) The relationship between photocurrent and incident light power density; (d) I-V curves (logarithmic form) at different optical powers. (the incident wavelength is 520 nm).

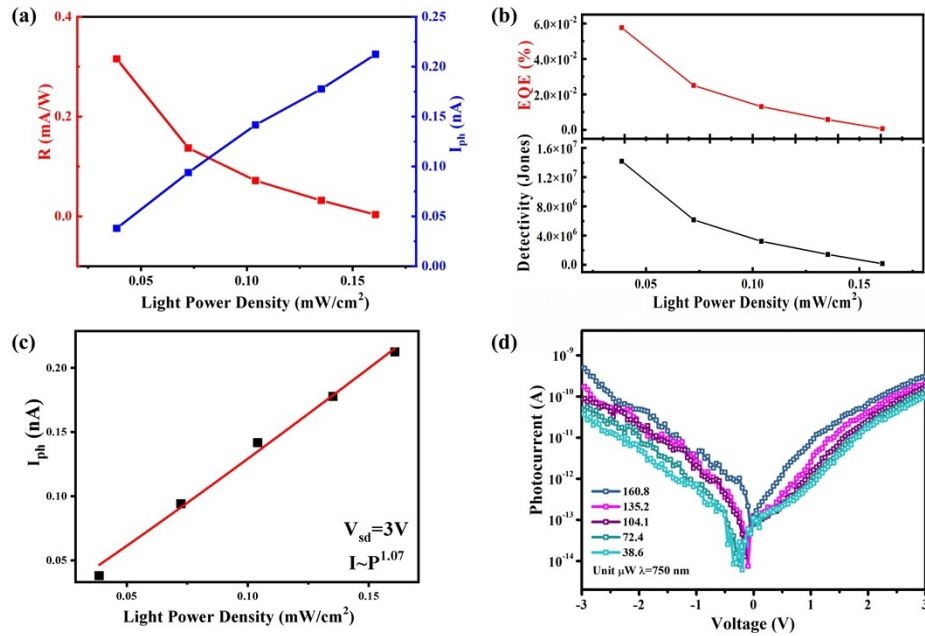

**Figure S3.** The incident light power of CdS/WSe<sub>2</sub> photodetector as a function of (a) photoresponse and photocurrent, (b) EQE and detectivity; (c) The relationship between photocurrent and incident light power density; (d) I-V curves (logarithmic form) at different optical powers. (the incident wavelength is 750 nm).

# Supporting Information

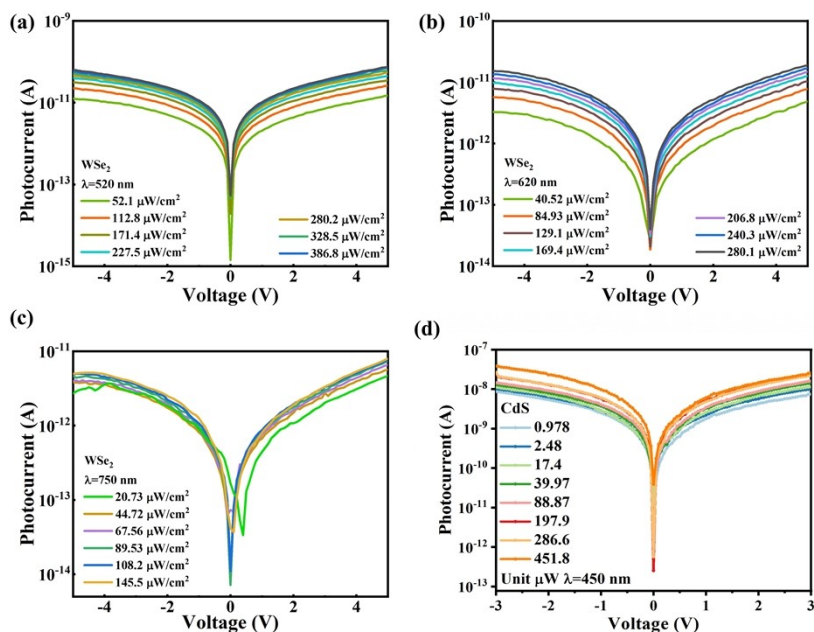

**Figure S4.** I-V curves (logarithmic form) of single WSe<sub>2</sub> at different optical powers. (the incident wavelength is 520 (a), 620 (b), 750 (c) nm, respectively); I-V curves (logarithmic form) of single CdS at different optical powers. (the incident wavelength is 450 (d) nm).

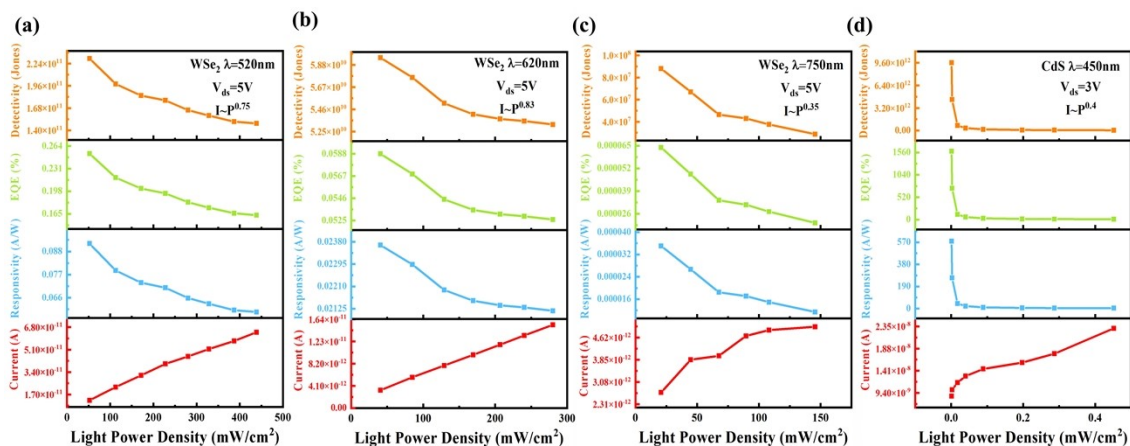

**Figure S5.** The photoelectric performance parameters of a single WSe<sub>2</sub> photodetector, with the incident light being 520 (a), 620 (b), and 750 (c) nm, respectively; The photoelectric performance parameters of a single CdS photodetector, with the incident light of 450 nm.

# Supporting Information

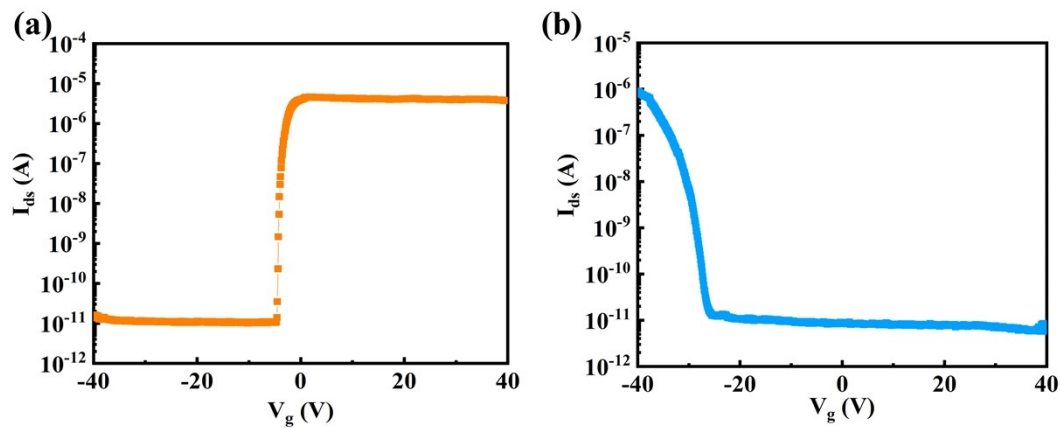

**Figure S6.** (a) Transfer characteristic curve of CdS-FET;  
(b) Transfer characteristic curve of WSe<sub>2</sub>-FET.

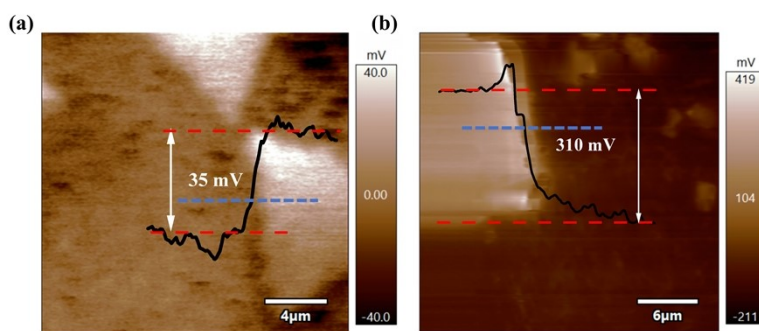

**Figure S7.** SKPFM characterization of the surface potential of (a) WSe<sub>2</sub>/Au, (b) CdS/Au.

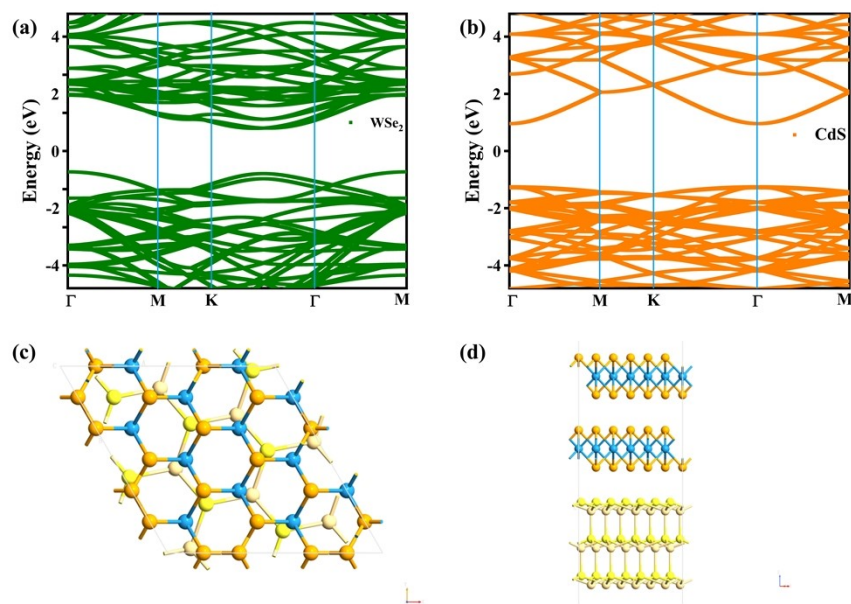

**Figure S8.** The calculated band structure for WSe<sub>2</sub> (a) and CdS (b) device along some high symmetry directions of the Brillouin zone; Top (c) and side (d) views of the heterojunction model used in the calculations.

# Supporting Information

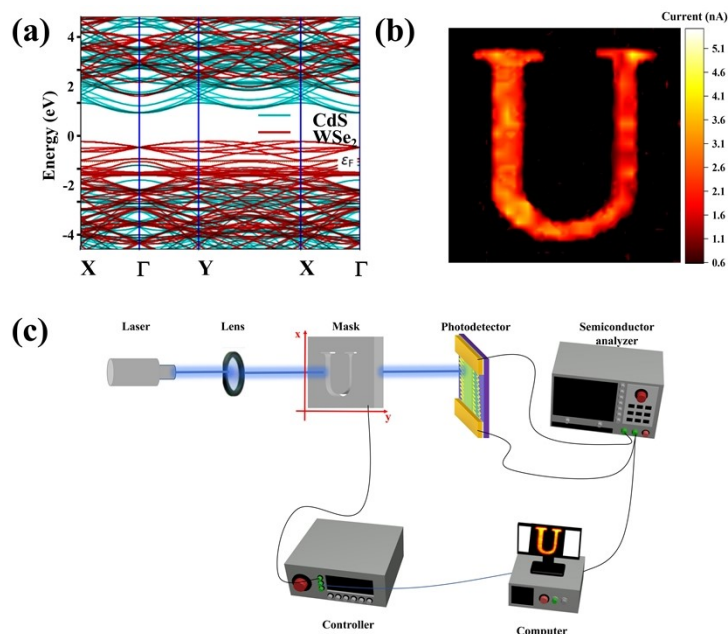

**Figure S9.** (a) The calculated band structure for CdS/WS<sub>2</sub> HTs along some high symmetry directions of the Brillouin zone; (b) CdS/WS<sub>2</sub> HTs photodetector imaging at 490 nm illumination ( $50 \mu\text{W}/\text{cm}^2$ ,  $V_{\text{ds}} = 3\text{V}$ ); (c) Schematic diagram of the imaging system.

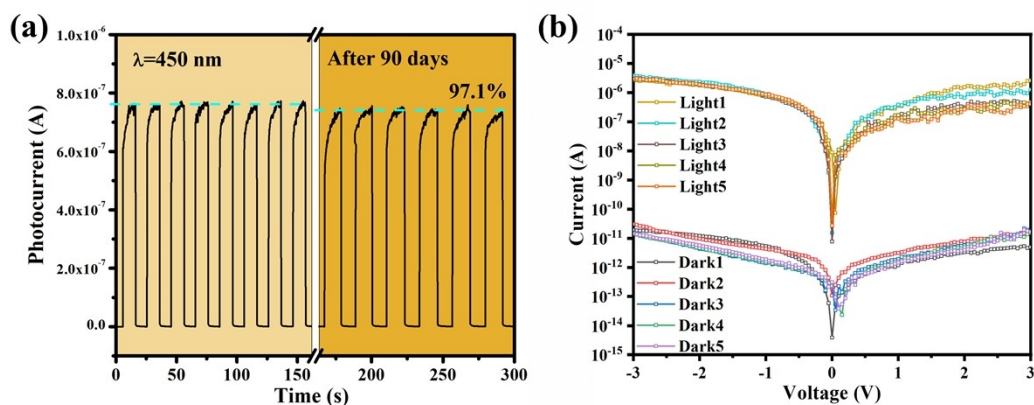

**Figure S10.** (a) The long-term stability tests of the WS<sub>2</sub>/CdS HTs under 450 nm ( $0.45 \text{ mW}/\text{cm}^2$ ) periodic illumination with 3 V bias voltage; (b) The reproducibility tests of five WS<sub>2</sub>/CdS HTs by 3 V under white-light illumination at controlled power densities ( $22.6 \text{ mW}/\text{cm}^2$ ) and dark condition.

**Table S1** The reproducibility of WS<sub>2</sub>/CdS HTs devices

|             | $I_{\text{light}} (-3\text{V})$ | $I_{\text{light}} (3\text{V})$ | $I_{\text{dark}} (-3\text{V})$ | $I_{\text{dark}} (3\text{V})$ | On/off ratio (-3V) | On/off ratio (3V)  |
|-------------|---------------------------------|--------------------------------|--------------------------------|-------------------------------|--------------------|--------------------|
| <b>Mean</b> | $3.03 \times 10^{-6}$           | $1.02 \times 10^{-6}$          | $1.87 \times 10^{-11}$         | $1.42 \times 10^{-11}$        | $1.62 \times 10^5$ | $7.15 \times 10^4$ |
| <b>SD</b>   | $4.87 \times 10^{-7}$           | $9.06 \times 10^{-7}$          | $6.95 \times 10^{-12}$         | $5.19 \times 10^{-12}$        | $3.63 \times 10^4$ | $5.10 \times 10^4$ |
| <b>RSD</b>  | 16.06%                          | 89.15%                         | 37.12%                         | 36.59%                        | 22.46%             | 71.31%             |
